# Supplementary material for: Selective enrichment and sensitive detection of peptide and proteinbiomarkers in human serum using polymeric reverse micelles and MALDI-MS
Source: Royal Society of Chemistry journal article supplement (doi:10.1039/c2an16089g), 2011-12-23
Supplement: c2an16089g.pdf [file c2an16089g.pdf]

**Supporting information for:**  
**Selective Enrichment and Sensitive Detection of Peptide and Protein Biomarkers in**  
**Human Serum Using Polymeric Reverse Micelles and MALDI-MS**

*Nadnudda Rodthongkum, Rajasekhar Ramireddy, S. Thayumanavan and Richard W.*  
*Vachet\**

Department of Chemistry, University of Massachusetts, Amherst, Massachusetts 01003

E-mail: [rwvachet@chem.umass.edu](mailto:rwvachet@chem.umass.edu)

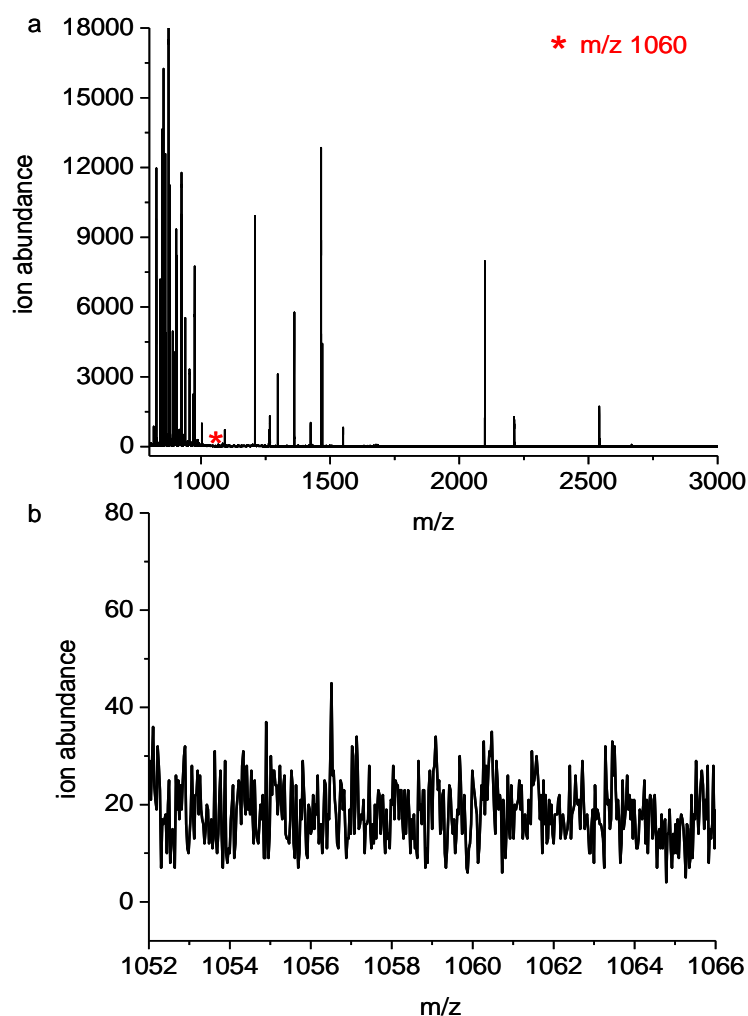

**Figure S1.** MALDI mass spectrum of a control experiment of human serum after HSA/IgG depletion extracted by the negatively charged polymers at pH 7.7 (a) an enlarge MALDI mass spectrum of figure S1a with m/z range of 1052-1066 (b).

**Table S1.** m/z ratio of all peptides that are observed in Figure 2a, 2d and Figure 3 within a mass range of 1000-3000 and S/N  $\geq$  3.0. The m/z ratios in bold are found in more than one spectrum.

| <b>Figure 2a</b><br>(organic phase with 5.0 x 10 <sup>-10</sup> M bradykinin extracted by negative polymer at pH 6.8)                                          | <b>Figure 2d</b><br>(organic phase with 5.0 x 10 <sup>-11</sup> M C4a extracted by negative polymer at pH 6.8)                                                         | <b>Figure 3</b><br>(organic phase with 1.0 x 10 <sup>-10</sup> M ITIH <sub>4</sub> extracted by positive polymer at pH 7.4)                            |
|----------------------------------------------------------------------------------------------------------------------------------------------------------------|------------------------------------------------------------------------------------------------------------------------------------------------------------------------|--------------------------------------------------------------------------------------------------------------------------------------------------------|
| 1034.5, 1080.1, 1158.2, 1175.1, 1207.8, <b>1248.9</b> , 1289.1, 1335.5, 1465.9, 1604.9, 1647.9, <b>1719.0</b> , <b>2000.2</b> , 2099.2, 2338.7, 2495.0, 2752.9 | 1034.5, 1148.0, 1158.2, 1175.1, 1187.2, 1192.5, <b>1248.9</b> , 1271.6, 1289.1, 1335.5, 1465.9, 1574.6, 1647.9, <b>1719.0</b> , <b>2000.2</b> , 2099.2, 2338.7, 2495.0 | 1015.1, 1037.6, 1094.4, 1107.2, 1212.5, <b>1248.9</b> , 1425.5, 1668.5, <b>1719.0</b> , 1775.1, 1924.5, <b>2000.2</b> , 2104.1, 2358.6, 2432.5, 2613.7 |

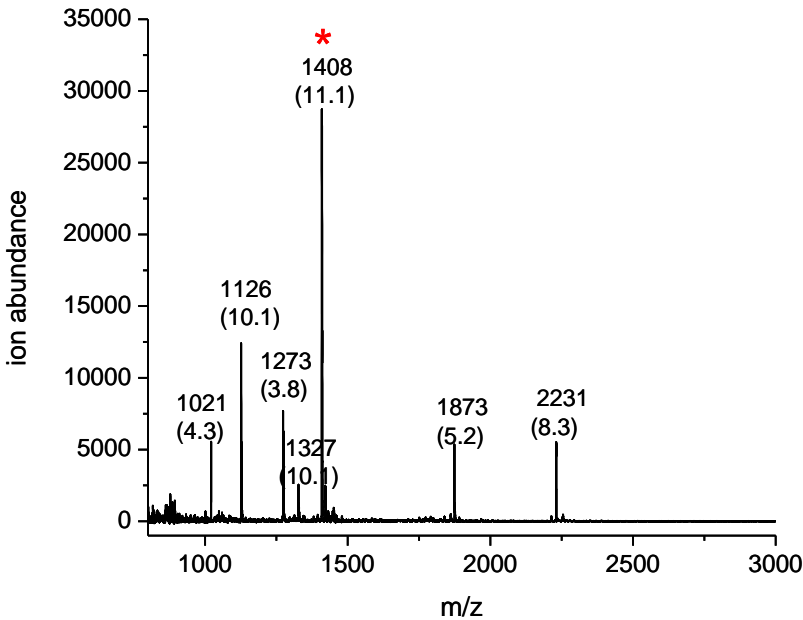

**Figure S2.** MALDI mass spectrum of peptide fragments of PSA digested by immobilized trypsin. The numbers above the peak indicate m/z and pI value of each PSA peptide fragment.
